# Supplementary material for: Risk and Protective Factors for Self-Harm and Suicide Behaviours among Serving and Ex-Serving Personnel of the UK Armed Forces, Canadian Armed Forces, Australian Defence Force and New Zealand Defence Force: A Systematic Review
Source: bioRxiv or medRxiv preprint supplement (doi:10.1101/2023.09.08.23295121), 2023-11-01
Supplement: Supplementary file [file media-1.pdf]

## Supplementary 1. Concepts and Keywords Used in Database Searches

| Concept                                                                                               | Keywords                                                                                                                                                                                                                                                                                                                                                                                                                                                                                                    |
|-------------------------------------------------------------------------------------------------------|-------------------------------------------------------------------------------------------------------------------------------------------------------------------------------------------------------------------------------------------------------------------------------------------------------------------------------------------------------------------------------------------------------------------------------------------------------------------------------------------------------------|
| <b>Concept A:</b><br><br><b>Self-harm and suicide behaviours</b><br><i>(Ti/Abs)</i><br><br><b>AND</b> | self-harm* OR "self harm*" OR self-injur* OR "self injur*" OR "self-injurious behavi?r" OR "deliberate self-harm" OR "non-suicidal self-injur*" OR "nonsuicidal self-injur*" OR "non suicidal self injur*" OR "self-inflicted injur*" OR "self-inflicted violence" OR "self-destructive behavi?r" OR self-violen* OR self-poison* OR self-cut* OR suicid* OR "suicid* attempt*" OR "attempted suicid*" OR "suicid* ideation" OR "suicid* thoughts" OR parasuicid* OR "completed suicid*" OR "fatal suicid*" |
| <b>Concept B:</b><br><br><b>Military</b><br><i>(Ti/Abs)</i><br><br><b>AND</b>                         | military OR "military personnel" OR "armed force*" OR servicemember* OR soldier* OR "military service" OR servicem?n OR servicewom?n OR veteran* OR ex-servi* OR navy OR naval servic* OR army OR "air force" OR airforce OR marine* OR "marine corp*" OR reserve* OR reservist OR national guard OR infantry* OR "military psychiatry" OR "military health" OR "military deployment*" OR deploy* war OR warfare OR warfighter* OR combat OR "armed conflict*" OR "defen?e force"                           |
| <b>Concept C:</b><br><br><b>Location</b><br><i>(Anywhere/Full Text)</i>                               | "United Kingdom" OR UK OR "Great Britain" OR Britain OR British OR England OR English OR Scotland OR Scottish OR Wales OR Welsh OR "Northern Ireland" OR "North Ireland" OR "N Ireland" OR Irish OR Canada OR Canadian OR "First Nations" OR Métis OR Inuit OR Australia OR Australian OR "Aboriginal Australians" OR "Torres Straight Islanders" OR "New Zealand" OR "New Zealanders" OR Māori OR "Pacific Islanders"                                                                                      |

**Note.** The Boolean operators 'OR' and 'AND' were used where appropriate. The asterisk (\*) denotes truncation and the question mark (?) denotes wildcards.
