# Supplementary material for: Risk and Protective Factors for Self-Harm and Suicide Behaviours among Serving and Ex-Serving Personnel of the UK Armed Forces, Canadian Armed Forces, Australian Defence Force and New Zealand Defence Force: A Systematic Review
Source: bioRxiv or medRxiv preprint supplement (doi:10.1101/2023.09.08.23295121), 2023-11-01

### Supplementary 3. PRISMA Flow Diagram

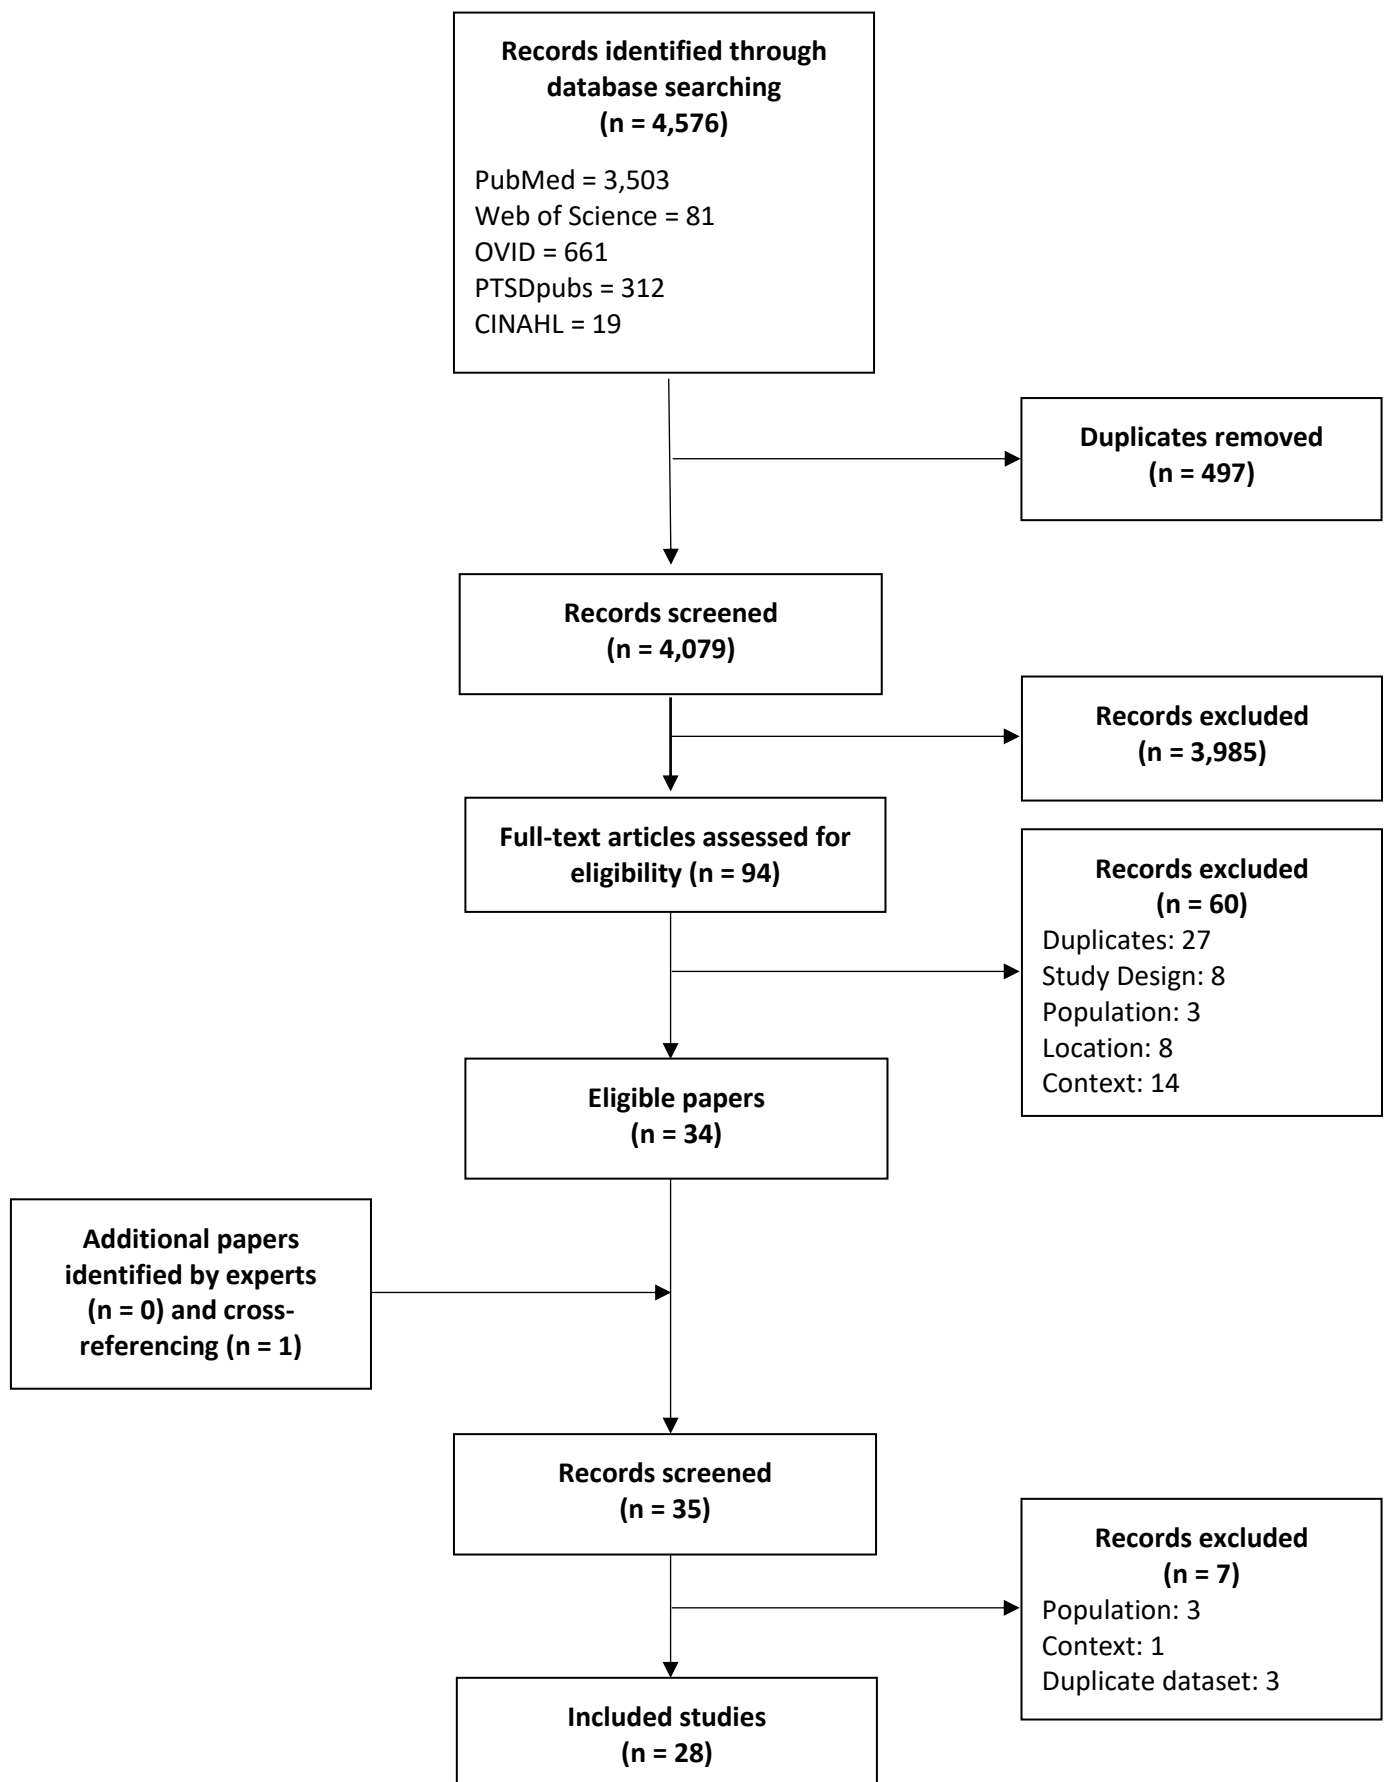

Supplement: Supplementary file [file media-3.pdf]
