# Supplementary material for: Risk and Protective Factors for Self-Harm and Suicide Behaviours among Serving and Ex-Serving Personnel of the UK Armed Forces, Canadian Armed Forces, Australian Defence Force and New Zealand Defence Force: A Systematic Review
Source: bioRxiv or medRxiv preprint supplement (doi:10.1101/2023.09.08.23295121), 2023-11-01
Supplement: Supplementary file [file media-4.pdf]

#### **Supplementary 4. List of Included Papers**

1. **Afifi et al (2016)** Association of Child Abuse Exposure With Suicidal Ideation, Suicide Plans, and Suicide Attempts in Military Personnel and the General Population in Canada
2. **Belik et al (2009)** Relation between traumatic events and suicide attempts in Canadian military personnel
3. **Bergman et al (2019)** Non-fatal self-harm in Scottish military veterans: a retrospective cohort study of 57,000 veterans and 173,000 matched non-veterans
4. **Bergman et al (2022)** Suicide among Scottish military veterans: follow-up and trends
5. **Boulos and Fikretoglu (2018)** Influence of military component and deployment-related experiences on mental disorders among Canadian military personnel who deployed to Afghanistan: A cross-sectional survey
6. **Harden and Murphy (2018)** Risk factors of suicidal ideation in a population of UK military veterans seeking support for mental health difficulties
7. **Hines et al (2013)** Self-harm in the UK military
8. **Jones et al (2019)** Suicidal ideation, suicidal attempts, and self-harm in the UK Armed Forces
9. **Jones et al (2021)** Do Junior Entrants to the UK Armed Forces have worse outcomes than Standard Entrants?
10. **Kapur et al (2009)** Suicide after leaving the UK armed forces - a cohort study
11. **Kerr et al (2018)** Increased risk of attempted suicide in Australian veterans is associated with total and permanent incapacitation, unemployment and posttraumatic stress disorder severity
12. **Ketcheson et al (2018)** Association between social support and mental health conditions in treatment-seeking Veterans and Canadian Forces personnel
13. **Nelson et al (2011)** Predictors of posttraumatic stress disorder, depression, and suicidal ideation among Canadian Forces personnel in a National Canadian Military Health Survey
14. **O'Toole et al (2015)** Suicidality in Australian Vietnam veterans and their partners
15. **Pinder et al (2012)** Self-harm and attempted suicide among UK armed forces personnel: results of a cross-sectional survey

16. **Richardson et al (2017)** Insomnia, psychiatric disorders and suicidal ideation in a National Representative Sample of active Canadian Forces members
17. **Richardson et al (2018)** Depression and the relationship between sleep disturbances, nightmares, and suicidal ideation in treatment-seeking Canadian Armed Forces members and veterans
18. **Sareen et al (2007)** Combat and peacekeeping operations in relation to prevalence of mental disorders and perceived need for mental health care: findings from a large representative sample of military personnel
19. **Sareen et al (2017)** Deployment-Related Traumatic Events and Suicidal Behaviours in a Nationally Representative Sample of Canadian Armed Forces Personnel
20. **Syed Sherriff et al (2019)** Childhood determinants of suicidality: comparing males in military and civilian employed populations
21. **Syed Sherriff et al (2020)** Childhood determinants of suicidality in men recently transitioned from regular military service
22. **Taillieu et al (2022)** Associations among child abuse history, deployment-related traumatic events, mental disorders, and suicidal behaviors in Canadian Regular Force personnel
23. **Thompson et al (2014)** Roles of physical and mental health in suicidal ideation in Canadian Armed Forces Regular Force veterans
24. **Thompson et al (2019)** Group identity, difficult adjustment to civilian life, and suicidal ideation in Canadian Armed Forces Veterans: Life After Service Studies 2016
25. **VanTil et al (2021)** Identifying release-related precursors to suicide among Canadian Veterans between 1976 and 2012
26. **Varker et al (2022)** Problem anger in veterans and military personnel: Prevalence, predictors, and associated harms of suicide and violence
27. **Williamson et al (2021)** The impact of moral injury on the wellbeing of UK military veterans
28. **Woodhead et al (2011)** Mental health and health service use among post-national service veterans: results from the 2007 Adult Psychiatric Morbidity Survey of England
